# Supplementary material
Source: MDPI journal article supplement (https://www.mdpi.com/2073-4352/13/8/1274)
Supplement: s1 [file s1]

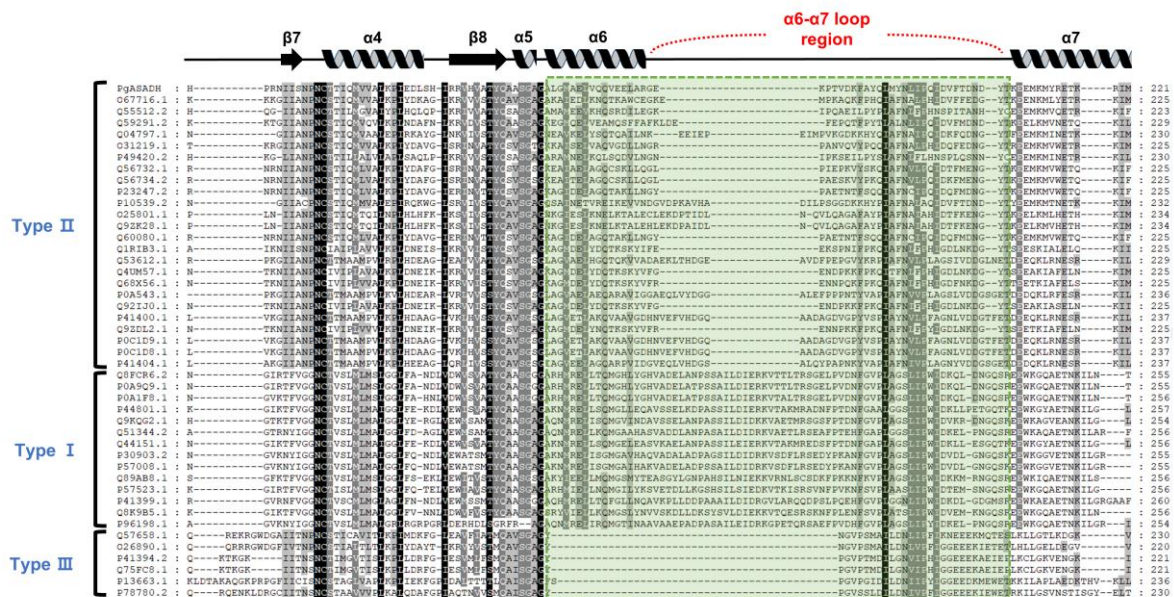

**Figure S1. Multiple sequence alignment and classification of ASADHs.** ASADH sequences were extracted from the clustering analysis dataset. The sequence from the  $\alpha 6$  –  $\alpha 6$  -  $\alpha 7$  loop region shows a major discrepancy, providing a basis to classify ASADHs into three types.

**Table S1. Aspartate semialdehyde dehydrogenases used for clustering analysis.**

|         | Uniprot code | Organisms                                                                  |
|---------|--------------|----------------------------------------------------------------------------|
| Type I  | Q8FCR6.2     | [ <i>Escherichia coli</i> CFT073]                                          |
|         | P0A9Q9.1     | [ <i>Escherichia coli</i> K-12]                                            |
|         | P0A1F8.1     | [ <i>Salmonella enterica</i> subsp. enterica serovar Typhimurium str. LT2] |
|         | P44801.1     | [ <i>Haemophilus influenzae</i> Rd KW20]                                   |
|         | Q9KQG2.1     | [ <i>Vibrio cholerae</i> O1 biovar El Tor str. N16961]                     |
|         | Q51344.2     | [ <i>Pseudomonas aeruginosa</i> PAO1]                                      |
|         | Q44151.1     | [ <i>Actinobacillus pleuropneumoniae</i> ]                                 |
|         | P30903.2     | [ <i>Neisseria meningitidis</i> MC58]                                      |
|         | P57008.1     | [ <i>Neisseria meningitidis</i> Z2491]                                     |
|         | Q89AB8.1     | [ <i>Buchnera aphidicola</i> str. Bp (Baizongia pistaciae)]                |
|         | P57523.1     | [ <i>Buchnera aphidicola</i> str. APS (Acyrtosiphon pisum)]                |
|         | P41399.1     | [ <i>Bordetella pertussis</i> Tohama I]                                    |
|         | Q8K9B5.1     | [ <i>Buchnera aphidicola</i> str. Sg (Schizaphis graminum)]                |
|         | P96198.1     | [ <i>Azotobacter vinelandii</i> ]                                          |
| Type II | PgASADH      | [ <i>Porphyromonas gingivalis</i> ]                                        |
|         | O67716.1     | [ <i>Aquifex aeolicus</i> VF5]                                             |
|         | Q55512.2     | [ <i>Synechocystis</i> sp. PCC 6803 substr. Kazusa]                        |
|         | Q59291.2     | [ <i>Campylobacter jejuni</i> subsp. jejuni NCTC 11168 = ATCC 700819]      |
|         | Q04797.1     | [ <i>Bacillus subtilis</i> subsp. subtilis str. 168]                       |
|         | O31219.1     | [ <i>Legionella pneumophila</i> ]                                          |
|         | P49420.2     | [ <i>Prochlorococcus marinus</i> subsp. marinus str. CCMP1375]             |
|         | Q56732.1     | [ <i>Shewanella</i> sp. DB6705]                                            |
|         | Q56734.2     | [ <i>Shewanella violacea</i> DSS12]                                        |
|         | P23247.2     | [ <i>Vibrio cholerae</i> O1 biovar El Tor str. N16961]                     |
|         | P10539.2     | [ <i>Streptococcus mutans</i> UA159]                                       |
|         | O25801.1     | [ <i>Helicobacter pylori</i> 26695]                                        |
|         | Q9ZK28.1     | [ <i>Helicobacter pylori</i> J99]                                          |
|         | Q60080.1     | [ <i>Vibrio mimicus</i> ]                                                  |
|         | Q1RIB3.1     | [ <i>Rickettsia bellii</i> RML369-C]                                       |
|         | Q53612.1     | [ <i>Streptomyces akiyoshiensis</i> ]                                      |
|         | Q4UM57.1     | [ <i>Rickettsia felis</i> URRWXC12]                                        |

|             |          |                                                                          |
|-------------|----------|--------------------------------------------------------------------------|
|             | Q68X56.1 | [ <i>Rickettsia typhi</i> str. Wilmington]                               |
|             | P0A543.1 | [ <i>Mycobacterium tuberculosis</i> variant bovis AF2122/97]             |
|             | Q92IJ0.1 | [ <i>Rickettsia conorii</i> str. Malish 7]                               |
|             | P41400.1 | [ <i>Corynebacterium flavescens</i> ]                                    |
|             | Q9ZDL2.1 | [ <i>Rickettsia prowazekii</i> str. Madrid E]                            |
|             | P0C1D9.1 | [ <i>Corynebacterium melassecola</i> ]                                   |
|             | P0C1D8.1 | [ <i>Corynebacterium glutamicum</i> ATCC 13032]                          |
|             | P41404.1 | [ <i>Mycolicibacterium smegmatis</i> ]                                   |
| Type<br>III | O28766.1 | [ <i>Archaeoglobus fulgidus</i> DSM 4304]                                |
|             | Q57658.1 | [ <i>Methanocaldococcus jannaschii</i> DSM 2661]                         |
|             | O26890.1 | [ <i>Methanothermobacter thermautotrophicus</i> str. Delta H]            |
|             | P41394.2 | [ <i>Leptospira interrogans</i> serovar Lai str. 56601]                  |
|             | Q75FC8.1 | [ <i>Leptospira interrogans</i> serovar Copenhageni str. Fiocruz L1-130] |
|             | P13663.1 | [ <i>Saccharomyces cerevisiae</i> S288C]                                 |
|             | P78780.2 | [ <i>Schizosaccharomyces pombe</i> 972h-]                                |
